# Supplementary material for: Predictive features of ligand‐specific signaling through the estrogen receptor
Source: PubMed Central journal article supplement (PMC4848761; doi:10.15252/msb.20156701), 2016-04-23
Supplement: MSB-12-864-s002.pdf [file MSB-12-864-s002.pdf]

## Expanded View Figures

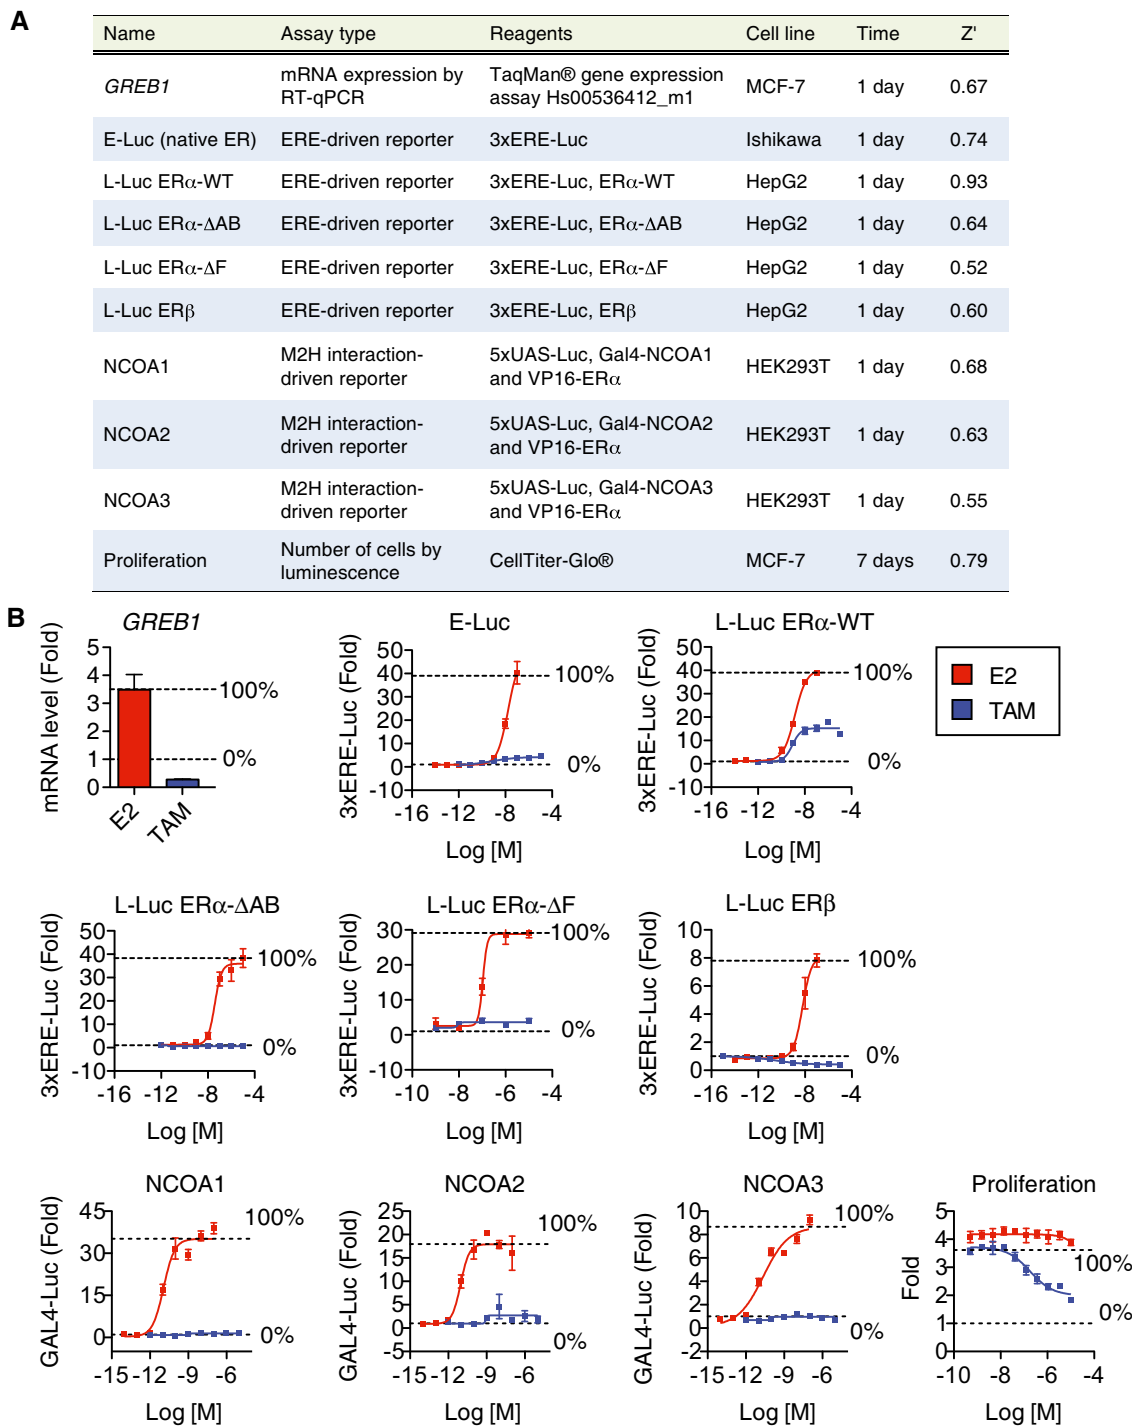

**Figure EV1. High-throughput screens for ER $\alpha$  ligand profiling.**

A Summary of ligand screening assays used to measure ER-mediated activities. ERE, estrogen-response element; Luc, luciferase reporter gene; M2H, mammalian 2-hybrid; UAS, upstream-activating sequence.

B Controls for screening assays described in panel (A), above. Error bars indicate mean  $\pm$  SEM,  $n = 3$ .

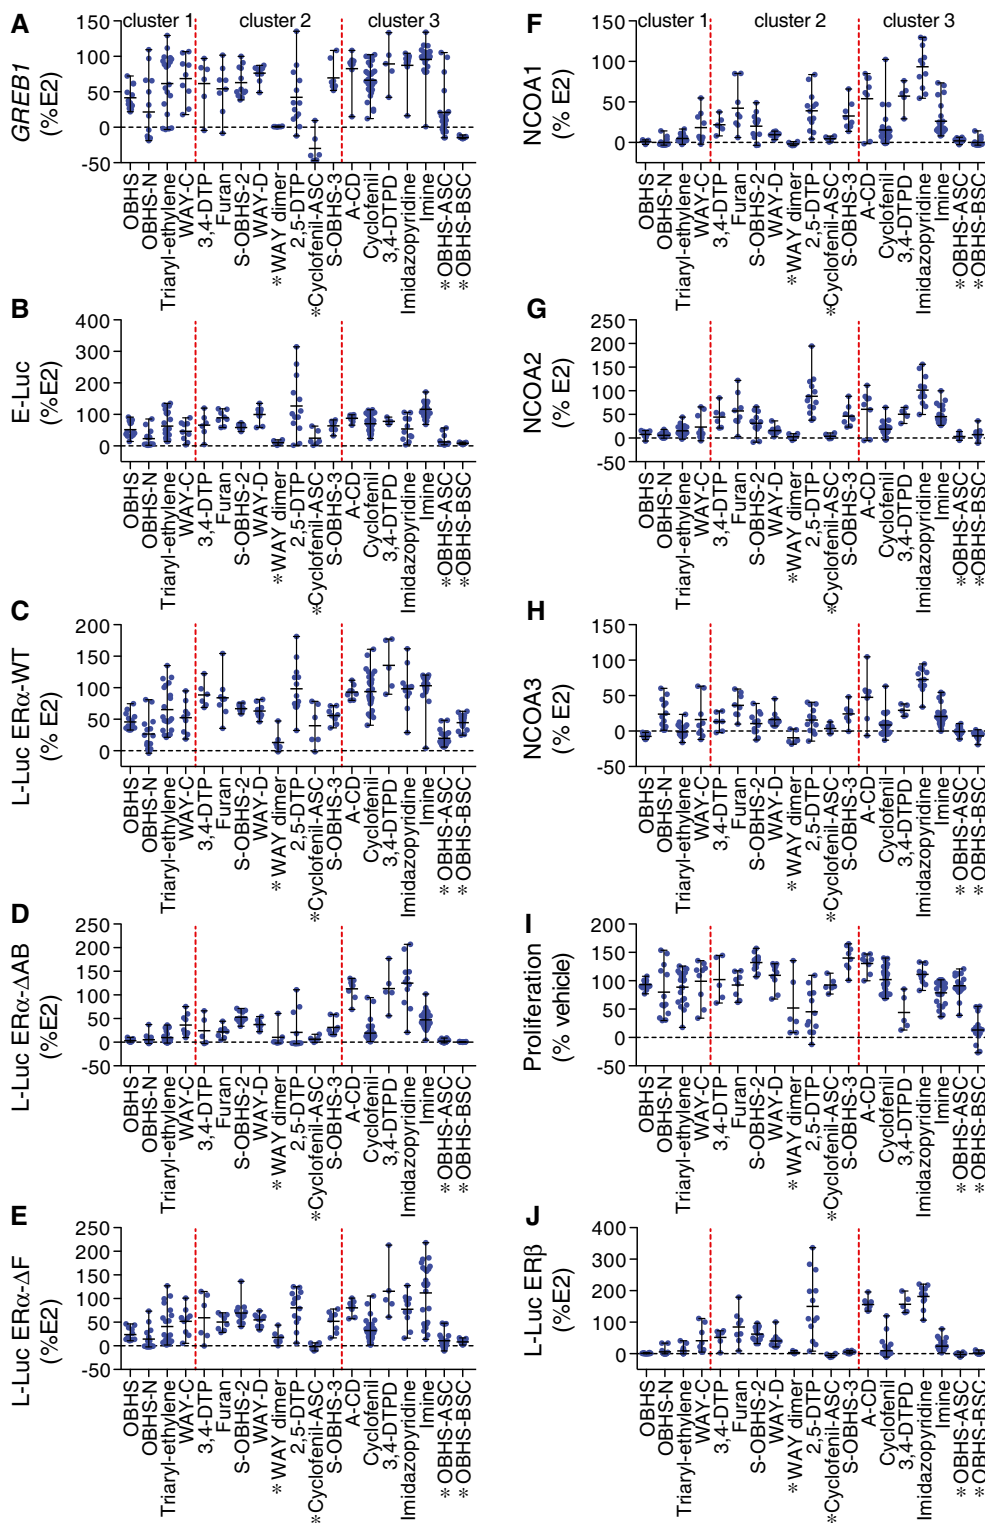

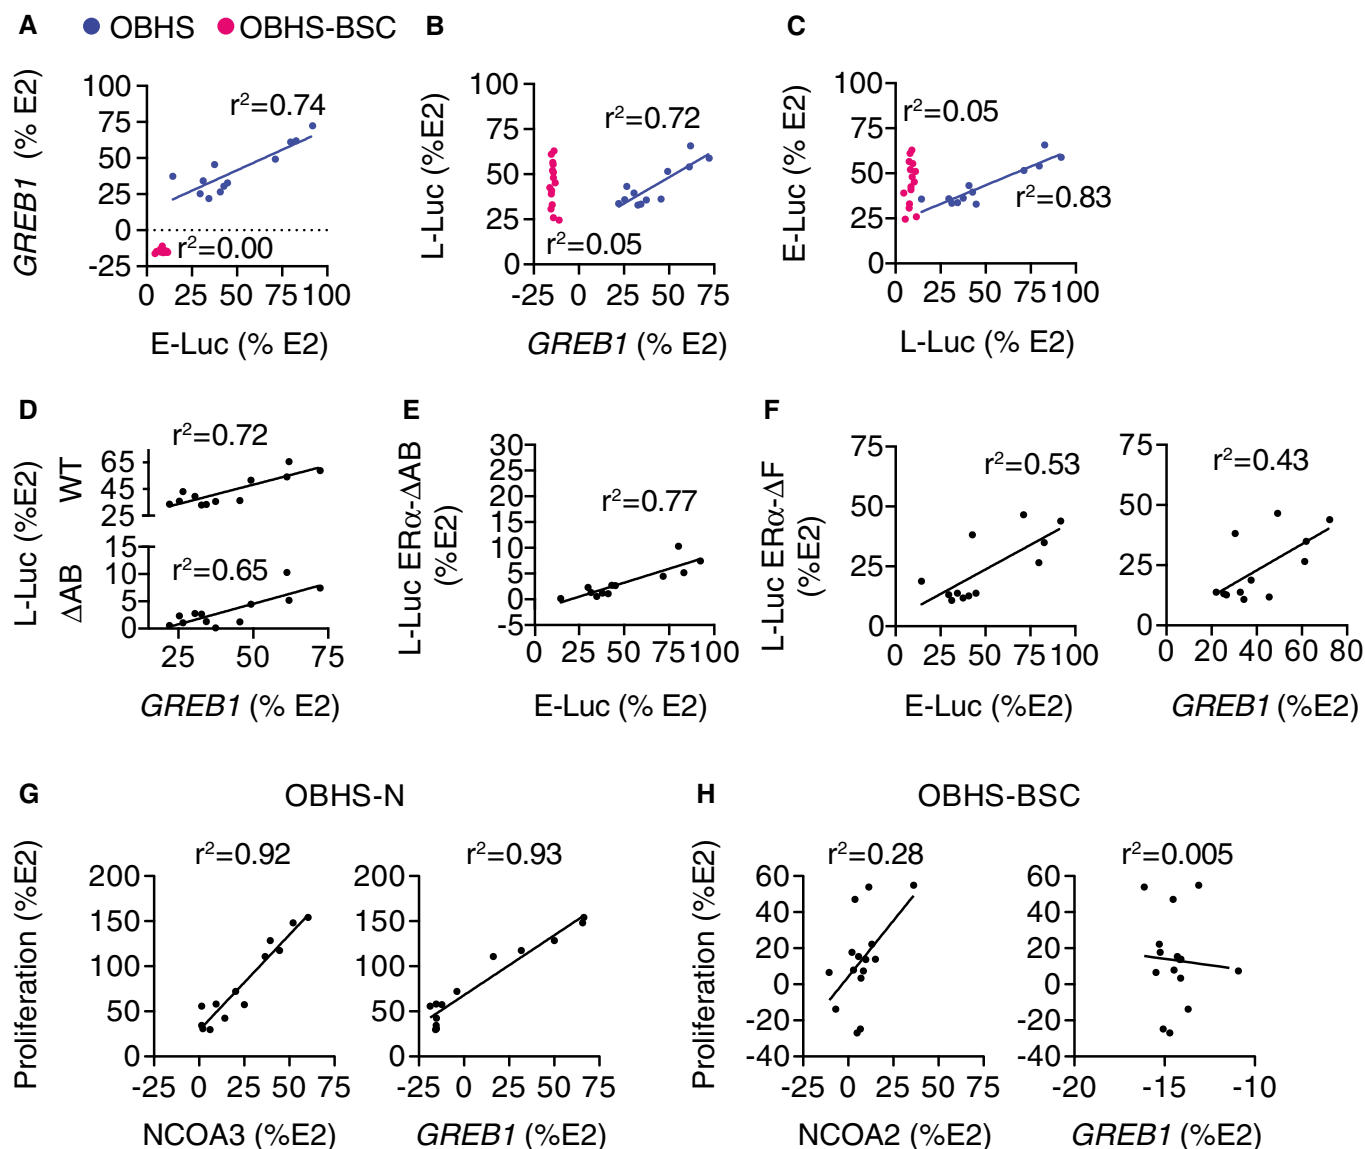

**Figure EV3. The side chain of OBHS-BSC analogs induces cell-specific signaling.**

A–C Correlation analysis of OBHS versus OBHS-BSC activity across cell types.

D, E Correlation analysis of L-Luc ER $\alpha$ - $\Delta$ AB activity versus endogenous ER $\alpha$  activity of OBHS analogs. In panel (D), L-Luc ER $\alpha$ -WT activity from panel (B) is shown for comparison.

F Correlation analysis of L-Luc ER $\alpha$ - $\Delta$ F activity versus endogenous ER $\alpha$  activities of OBHS analogs.

G, H Correlation analysis of MCF-7 cell proliferation versus NCOA2/3 recruitment or GREB1 levels observed in response to (G) OBHS-N and (H) OBHS-BSC analogs.

Data information: In each panel, a data point indicates the activity of a distinct compound.

Source data are available online for this figure.

**A** E-Luc vs. L-Luc ER $\beta$

|           |                  | $r^2$  | $p$     |
|-----------|------------------|--------|---------|
| Cluster 1 | OBHS             | 0.04   | 5.4E-1  |
|           | OBHS-N           | 0.12   | 2.5E-1  |
|           | Triaryl-ethylene | 0.02   | 5.8E-1  |
|           | WAY-C            | 0.16   | 2.9E-1  |
| Cluster 2 | 3,4-DTP          | 0.03   | 7.4E-1  |
|           | Furan            | 0.00   | 9.9E-1  |
|           | S-OBHS-2         | 0.21   | 1.2E-1  |
|           | WAY-D            | 0.03   | 6.5E-1  |
|           | WAY dimer        | 0.03   | 7.3E-1  |
|           | 2,5-DTP          | 0.43   | 1.0E-2* |
| Cluster 3 | Cyclofenil-ASC   | 0.08   | 5.8E-1  |
|           | S-OBHS-3         | 0.28   | 1.8E-1  |
|           | A-CD             | 0.36   | 1.2E-1  |
|           | Cyclofenil       | 0.22   | 9.4E-3* |
|           | 3,4-DTPD         | 0.19   | 4.6E-1  |
|           | Imidazopyridine  | 0.13   | 2.7E-1  |
|           | Imine            | 0.00   | 8.1E-1  |
| OBHS-ASC  | 0.13             | 1.2E-1 |         |
| OBHS-BSC  | 0.00             | 9.1E-1 |         |

**B** E-Luc vs. L-Luc ER $\alpha$ -WT

|            | $r^2$ | $p$     |
|------------|-------|---------|
| 2,5-DTP    | 0.63  | 6.0E-4* |
| Cyclofenil | 0.28  | 2.7E-3* |

**Figure EV4. ER $\beta$  activity is not an independent predictor of E-Luc activity.**

A ER $\beta$  activity in HepG2 cells rarely correlates with E-Luc activity.

B ER $\alpha$  activity of 2,5-DTP and cyclofenil analogs correlates with E-Luc activity.

Data information: The  $r^2$  and  $P$  values for the indicated correlations are shown in both panels. \*Significant positive correlation ( $F$ -test for nonzero slope,  $P$ -value)

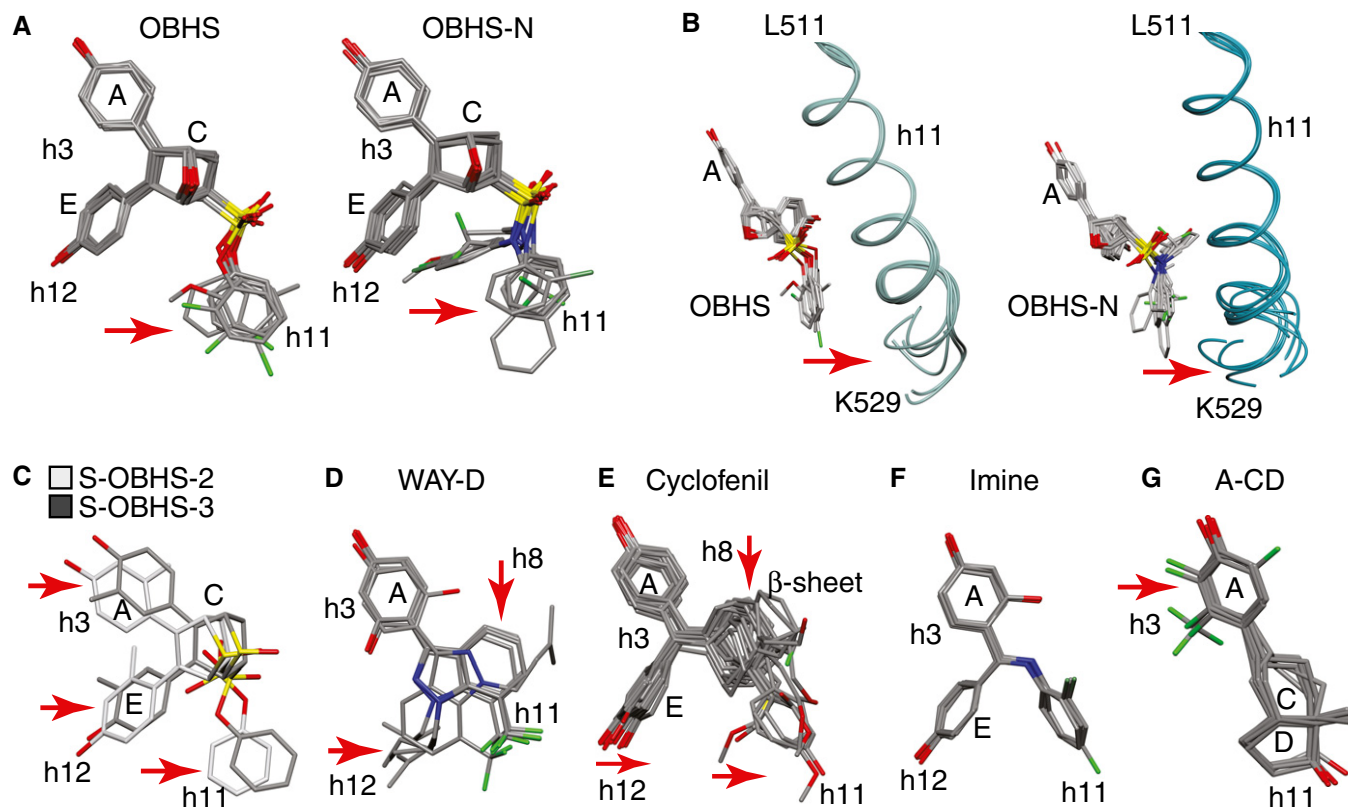

**Figure EV5. Structure-class analysis of indirect modulators.**

A, B Structure-class analysis of indirect modulators in cluster 1. Crystal structures of the ER $\alpha$  LBD bound to OBHS and OBHS-N analogs were superposed. The bound ligands are shown in panel (A). Arrows indicate chemical variance in the orientation of the different h11-directed ligand side groups. Panel (B) shows the ligand-induced conformational variation at the C-terminal region of h11 (OBHS: PDB 4ZN9, 4ZNH, 4ZNS, 4ZNT, 4ZNU, 4ZNV, and 4ZNW; OBHS-N: PDB 4ZUB, 4ZUC, 4ZWH, 4ZWK, 5BNU, 5BP6, 5BPR, and 5BQ4).

C–G Structure-class analysis of indirect modulators in clusters 2 and 3. Crystal structures of the ER $\alpha$  LBD bound to ligands with cell-specific activities were superposed. The bound ligands are shown, and arrows indicate considerable variation in the orientation of the different h3-, h8-, h11-, or h12-directed ligand side groups.
